# Supplementary material
Source: PubMed Central journal article supplement (PMC5934995)
Supplement: NIHMS962671-supplement-Supporting_Information.pdf [file NIHMS962671-supplement-Supporting_Information.pdf]

# Mechanistic Basis for ATP-Dependent Inhibition of Glutamine Synthetase by Tabtoxinine- $\beta$ -Lactam

Supporting Information

Garrett J. Patrick<sup>a</sup>, Luting Fang<sup>a</sup>, Jacob Schaefer<sup>a</sup>, Sukrit Singh<sup>b</sup>, Gregory R. Bowman<sup>b</sup>, and Timothy A. Wencewicz<sup>a\*</sup>

<sup>a</sup>*Department of Chemistry, Washington University in St. Louis, One Brookings Drive, St. Louis, MO, 63130, USA*

<sup>b</sup>*Department of Biochemistry and Molecular Biophysics, Washington University School of Medicine, 660 South Euclid Avenue, St. Louis, MO, 63110, USA*

## Table of Contents:

|             |                             |                |
|-------------|-----------------------------|----------------|
| <b>I.</b>   | Supplementary Tables .....  | <b>S2-S4.</b>  |
| <b>II.</b>  | Supplementary Figures ..... | <b>S5-S15.</b> |
| <b>III.</b> | Supplementary Schemes ..... | <b>S16.</b>    |
| <b>IV.</b>  | Acknowledgements .....      | <b>S17.</b>    |
| <b>V.</b>   | References .....            | <b>S17.</b>    |

\*Correspondence to TAW: Email: [wencewicz@wustl.edu](mailto:wencewicz@wustl.edu); Ph: 314-935-7247; Fax: 314-935-4481; ORCID: 0000-0002-5839-6672

## I. Supplementary Tables

**Supplementary Table 1.** Strains and plasmids used in this work.

| <b>Strain</b>                                            | <b>Plasmid</b> | <b>Inducible Gene/Marker</b>       | <b>Origin/Reference</b> |
|----------------------------------------------------------|----------------|------------------------------------|-------------------------|
| <i>Pseudomonas syringae</i> pv. <i>tabaci</i> ATCC 11528 | None           | Tabtoxin producer                  | ATCC                    |
| <i>E. coli</i> ATCC 29522                                | None           | Antibiotic Susceptibility Testing  | ATCC                    |
| <i>E. coli</i> TOP10                                     | None           | Cloning strain                     | Invitrogen              |
| <i>E. coli</i> BL21 (DE3)                                | None           | Protein expression strain          | Agilent                 |
| <i>E. coli</i> BL21 (DE3)                                | pET28a         | <i>GlnA</i> from <i>E. coli</i>    | This Work               |
| <i>E. coli</i> BL21 (DE3)                                | pET28a         | <i>GlnA</i> from <i>S. aureus</i>  | This work               |
| <i>E. coli</i> BL21 (DE3)                                | pET28a         | <i>GlnA</i> from <i>H. sapiens</i> | This work               |
| <i>E. coli</i> TOP10                                     | pET28a         | <i>GlnA</i> from <i>E. coli</i>    | This work               |
| <i>E. coli</i> TOP10                                     | pET28a         | <i>GlnA</i> from <i>S. aureus</i>  | This work               |
| <i>E. coli</i> TOP10                                     | pET28a         | <i>GlnA</i> from <i>H. sapiens</i> | This work               |

**Supplementary Table 2. Codon optimized glutamine synthetase genes used in this work.**

| <b>Gene</b> | <b>Source</b>     | <b>Codon Optimized Nucleotide Sequence</b>                                                                                                                                                                                                                                                                                                                                                                                                                                                                                                                                                                                                                                                                                                                                                                                                                                                                                                                                                                                                                                                                                                                                                                                                                                                                                                                                                                                                                                                       |
|-------------|-------------------|--------------------------------------------------------------------------------------------------------------------------------------------------------------------------------------------------------------------------------------------------------------------------------------------------------------------------------------------------------------------------------------------------------------------------------------------------------------------------------------------------------------------------------------------------------------------------------------------------------------------------------------------------------------------------------------------------------------------------------------------------------------------------------------------------------------------------------------------------------------------------------------------------------------------------------------------------------------------------------------------------------------------------------------------------------------------------------------------------------------------------------------------------------------------------------------------------------------------------------------------------------------------------------------------------------------------------------------------------------------------------------------------------------------------------------------------------------------------------------------------------|
| <i>GlnA</i> | <i>E. coli</i>    | ATGAGCGCGGAGCAGCTGCTGACCATGCTGAACGAGCAGCAAGTGAAGTTCGTTGACCTGCGTTTTACCGATACCAAG<br>GGTAAAGAGCAGCACGTGACCATCCGGCGCACCAAGTTAACGCGGAATTCCTTTGAGGAAGGTAATGTTGACGGC<br>AGCAGCATCGGTGGCTGGAAAGGCATTAACGAAAGCGACATGGTGTGATGCCGGATGCGAGCACCGGGTTATCGAC<br>CCGTTCTTTGCGGATAGCACCTGATCATTCGTTGCGATATTCTGGAGCCGGTACCCTGCAGGGTTATGACCGTGAT<br>CCGCGTAGCATCGCGAAACGTGCGGAAGACTATCTGCGTAGCACCGGATTGCGGATACCGTGTGTTGGTCCGGAG<br>CCGGAATTCCTTTCTGTTGACGATATCCGTTTTGGTAGCAGCATTAGCGGCAGCCAGTTGCGATCGACGATATTGAG<br>GGTGCCTGGAACAGCAGCACCCAATACGAAGGTGGCAACAAGGGTACCCTCCGGCGGTGAAAGGTGGCTATTTCCG<br>GTGCCCGCGTTGACAGCGCGCAGGATATCCGTAGCGAGATGTGCCCTGGTTATGGAACAAATGGGTCTGGTGGTTGAA<br>GCGCACCCATGAAGTTGCGACCGCGGTCAGAACGAGGTTGCGACCCGTTTCAACACCATGACCAAGAAAGCGGAC<br>GAAATCCAAATTTACAAGTATGTGGTTCACAACGTTGCGCACCGTTTCGGCAAGACCGCGACCTTTATGCCGAAACCG<br>ATGTTGCGCGACAACGGTAGCGGCATGCACTGCCACATGAGCCTGAGCAAGAACGGGTGAACCTGTTTGGCGGTGAT<br>AAATACGCGGGCCTGAGCGAGCAGCGCTGACTATATCCGTGGCGTTATTAAGCACGCGAAAGCGATCAACGCGCTG<br>GCGAACCCGACCAACAGCTACAAGCTCTGGTGGCGGTTATGAGGCGCGGTTATGCTGGCGTATAGCGCGCT<br>AACCGTAGCGGAGCATCCGTATTCGGTGGTTAGCAGCCGAAAGCGCGTCTATTGAAGTTCGTTTTCCGGATCCG<br>GCGCGAACCCGTATCTGTGCTTTGCGCGCTGCTGATGGCGGCTGGATGGCATCAAGAACAAATTCACCCGGG<br>GAGCGATGGACAAGAACCTGTATGATCTGCCCGCGGAGGAAGCGAAAGAAATTCGCAAGTGGCGGGCAGCCTGGAG<br>GAAGCGCTGAACGAGCTGGACCTGGATCGTGAATTTCTGAAAGCGGTTGGCGTTTTACCCGACGAAGCGATCGATGCG<br>TACATTGCGCTGCGTGTGAGGAAGACGATCGTGTGCGTATGACCCCGCACCGGTTGAGTTCAACTGACTATAGC<br>GTTTAA |
| <i>GlnA</i> | <i>S. aureus</i>  | ATGCCGAAACGTACCTTCACCAAGGAAGACATTTCGTAATTTGCGGAGGAAGAGAAGTGCCTTACCTGCGTCTGCAG<br>TTCACCGATATCCTGGGTACCAATTAAGAAGCTGGAAGTTCGGTTAGCCAACTGGAAAAAGTTCGGACACGAGATG<br>ATGTTGATGGTAGCAGCATTGAGGGCTTTGTGCGTATCGAAGAGAGCGACATGTACCTGCACCCGGACCTGGATAACC<br>TGGGTGATTTTTCCGTGGACCGCGGGTCAGGGCAAGGTTGCGCGTCTGATCTGCGACGTGTATAAAACCGATGGTACC<br>CCGTTTGGGGCGATCCGCGTGGCAACCTGAAACGTGTTCTGAAGGAAATGGAGGACCTGGGTTTACCGATTTAAC<br>CTGGGCCCGGAACCGGAGTTCTTTCTGTTCAAACCTGGACGAAAAGGGCGAGCCGACCCTGGAACCTGAACGACGATGGT<br>GGTACTTTGACCTGGCGCCGACCGATCTGGGTGAAAACCTGCCGCTGATATTGTTCTGGAACCTGGAGGACATGGGT<br>TTTGATATCGAAGCGAGCCACCATGAGGTTGCGCGGGTCAGCACGAAATCGACTTCAAATATGCGGATGCGGTGACC<br>GCGTGGCACAACATTCAAACCTTTAAACTGGTGGTTAAGACCATCGCGGTAAGCACAACCTGCACGCGACCTTCATG<br>CCGAAACCGCTGTTTGGTGTAAACGGTAGCGCATGCACTTCAACGTGAGCCTGTTAAGGGTAAAGAGAACCGGTT<br>TTTGATCCGAACACCGAAAATGGGCTGACCGAGACCGGTTACCAATTCACCGGGGTGTTCTGAAGAACGCGCGTGGC<br>TTTACCGCGTTTGAACCCGCTGGTGAACAGCTATAAACGCTCTGGTGGCGGTTACGAAGCGCGTGTATATTGCG<br>TGGAGCGGCAAGAACCGTAGCCCGTGTATCCGTGTTCCGAGCAGCGTGGCCTGAGCACCCGTATTGAAGTTCGTAGC<br>GTGGATCCGGCGGCAACCCGTACATGGCGCTGGCGCGGATTCTGGAAGCGGCTGGATGGCATCAAGAACAACCTG<br>AAGTTCCGGAGCCGTTGAACAGAACATTTACGAAATGAACCGTGAAGAGCGTGAAGCGGTTGGTATCCAAGACCTG<br>CCGAGCACCTGTATACCGCGCTGAAGGCGATGCGTGAACAGGTTGATCAAGAAAGCGCTGGGCAACCCATCTAT<br>AACCAGTTCATTAACAGCAAAAGCATCGAATGGACTACTATCGTACCCAAGTGAAGGATGGGAGCGTGTACAGTAC<br>ATGAAGCAATATTA                                                            |
| <i>GlnA</i> | <i>H. sapiens</i> | ATGACCACCAGCGGAGCAGCCACCTGAACAAGGGCATCAAACAGGTGTACATGAGCCTGCCGAGGGTGAAAAGGTT<br>CAAGCGATGTATATCTGGATTGACGGTACCGGCGAGGGTCTGCGTTGCAAGACCCGTACCCTGGATAGCGAACGAAA<br>TGCGTGGAGGAACTGCCGAGTGAACCTTCGACGGCAGCAGCACCTGCAAAGCGAAGTAGCAACAGCGATATGTAC<br>CTGGTTCGGCGGGGATGTTCCGTGACCCGTTTCGTAAGGATCCGAACAACTGGTGTGTGCGAAGTTTTCAAGTAT<br>AACCGTCTGCGCGGAGACCAACCTGCGTACACCTGCAAACGTATCATGGACATGGTTAGCAACAGCACCCTGG<br>TTTGGCATGGAGCAAGAATACACCCTGATGGGACCGATGGTACCCGTTCCGTTGGCCGAGCAACGGTTTTCCGGT<br>CCGAGGGTCCGTAATTTGCGGTGTGGTGGGACCCGTGCGTATGGCCGTGATATCGTTGAAGCGCACTACCCTGG<br>TGCTGTATGCGGGCTGAAAATGCGGGTACCAACCGGAAAGTATGCGCGCGCAGTGGGAATTCAAATCGGTCCG<br>TGCGAGGGCATTAGCATGGGTGACCACCTGTGGGTTGCGCGTTTTATTCTGCACCGTGTGTGCGAGGACTTCGGCGTT<br>ATCGCGACCTTTGATCCGAAGCCGATTCGGGTAACGGAACCGCGCGGTTGCCACACCAACTTCAGCACAAGGCG<br>ATGCGTGAAGAAAACGGTCTGAAATACATCGAGGAAGCGATTGAAAAGCTGAGCAAACCTACCAATACCACATCCG<br>TGCGTATGACCCGAAAGGTGGCTGGATAACGCGCTGCTGACCGGCTTCCACGAGACCAGCAACATTAACGACTT<br>TAGCGCGGTTGTGGCAACCGTAGCGGAGCATCCGTATTCGGTACCCTGGCCAGGAGAAGAAAGTTACTTCGA<br>AGACCGTCTCCGAGCGGAACTGCGATCCGTTAGCGTACCAGGCGCTGATCCGTACCTGCCTGCTGAACGAGAC<br>CGGTGATGAACCGTTTCAATATAAGAACTAA                                                                                                                                                                                                                                                                                                                     |

**Supplementary Table 3.** Primary protein sequence of GS homologs used in this work.

| Gene        | Source            | Primary Protein Sequences of N-His <sub>6</sub> -GS Homologs <sup>a</sup>                                                                                                                                                                                                                                                                                                                                                                                                                                                            |
|-------------|-------------------|--------------------------------------------------------------------------------------------------------------------------------------------------------------------------------------------------------------------------------------------------------------------------------------------------------------------------------------------------------------------------------------------------------------------------------------------------------------------------------------------------------------------------------------|
| <i>GlnA</i> | <i>E. coli</i>    | MGSSHHHHHHSSGLVPRGSHMSAEHVLTMLNEHEVKFVDLRFDTKKGKEQHVTIPAHQVNAEFFEFGKMFDDGSSI<br>GGWKGINESDMVLMPDASTAVIDPFFADSTLIIRCDILEPGLTQGYDRDPRSIakraedyLRSTGIADTVLFGPEPEFFLF<br>DDIRFGSSISGSHVAIDDIEGAWNSSTQYEGGNKGHRPAVKGGYFPVPPVDSAQDIRSEMCLVMEQMGLVVEAHHHEV<br>ATAGQNEVATRFNTMTKKADEIQIYKYVVHNVahrfgktatfmpkpmfmgdngsgmhchmslkskngvnlFAGDKYAG<br>LSEQALYYIGGVIKHAKAINALANPTTNSYKRLVPGYEAPVMLAYSARNRSASIRIPVVSPPKARRIEVRFPDPAANPYLC<br>FAALLMAGLDGIKNIHPGEAMDKNLYDLPPEEAKEIPQVAGSLEEALNELDLDFREFLKAGGVFTDEAIDAYIALRREE<br>DDRVRMTPHPVEFELYYSV |
| <i>GlnA</i> | <i>S. aureus</i>  | MGSSHHHHHHSSGLVPRGSHMPKRTFTKEDIRKFAEEENVRYRLRQFTDILGTIKNVEVPVSQLEKVLDNEMMFDG<br>SSIEGFVRIEESDMYLHPDLDTWVIFPWTAGQGKVARLICDVKYKTDGTPFEGDPRANLKRVLKEMEDLGFDFNLGPE<br>PEFFLFKLDEKGEPTLELNDDGGYFDLAPTDLGENCRRDIVLEEDMGFDIEASHHEVAPGQHEIDFKYADAVTACDNI<br>QTFKLVVKTIARKHNLHATFMPKPLFGVNGSGMHFNVSFLKKGKNAFFDPNTEMLTETAYQFTAGVLKNARGFTAV<br>CNPLVNSYKRLVPGYEAPCYIAWSGKNRSPLIRVPSRGLSTRIEVRSDPAANPYMALAAILEAGLDGIKKNLKVPEPV<br>NQNIYEMNREEREAVGIQDLPSTLYTALKAMRENEVIKKALGNHIYNQFINSKSIEWDYRRTQVSEWERDQYMKQY                                   |
| <i>GlnA</i> | <i>H. sapiens</i> | MGSSHHHHHHSSGLVPRGSHMTTSASSHLNKGIKQVYMSLPQGEKVQAMYIWIWGTGEGLRCKTRTLTLDSEPKCREE<br>LPEWNFDGSSTLQSEGSNSDMYLPAAMFRDPFRKDPNKLVLCEVFKYNNRRPAETNLRHTCKRIMDMVSNQHPWFG<br>MEQEYTLMGTDGHPFGWPSNGFPGPQGPYYCGVGADRAYGRDIVEAHYRACLYAGVKIAGTNAEVMPAQWFEFQIGPC<br>EGISMGDHLWVARFILHRVCEDFGVIAFDPKPIPGNWNWAGCHTNFSTKAMREENGLKYIEEAIEKLSKRHQYHIRAY<br>DPKGGLDNARRLTGFHETSININDFSAGVANRSASIRIPRTVQGEKKGYPEDRRPSANCDPFSVTEALIRTCLLNETGDEP<br>FQYKN                                                                                                     |

<sup>a</sup>Hexahistidine motif with thrombin cleavage site highlighted in yellow.

**Supplementary Table 4.** Percent sequence identity of GS homologs.

| GS Homolog <sup>a</sup> | <i>E. coli</i> | <i>S. aureus</i> | Human |
|-------------------------|----------------|------------------|-------|
| <i>E. coli</i>          |                | 40.5%            | 24.7% |
| <i>S. aureus</i>        | 40.5%          |                  | 20.5% |
| Human                   | 24.7%          | 20.5%            |       |

<sup>a</sup>Percent sequence identities were determine using Clustal W.

## II. Supplementary Figures

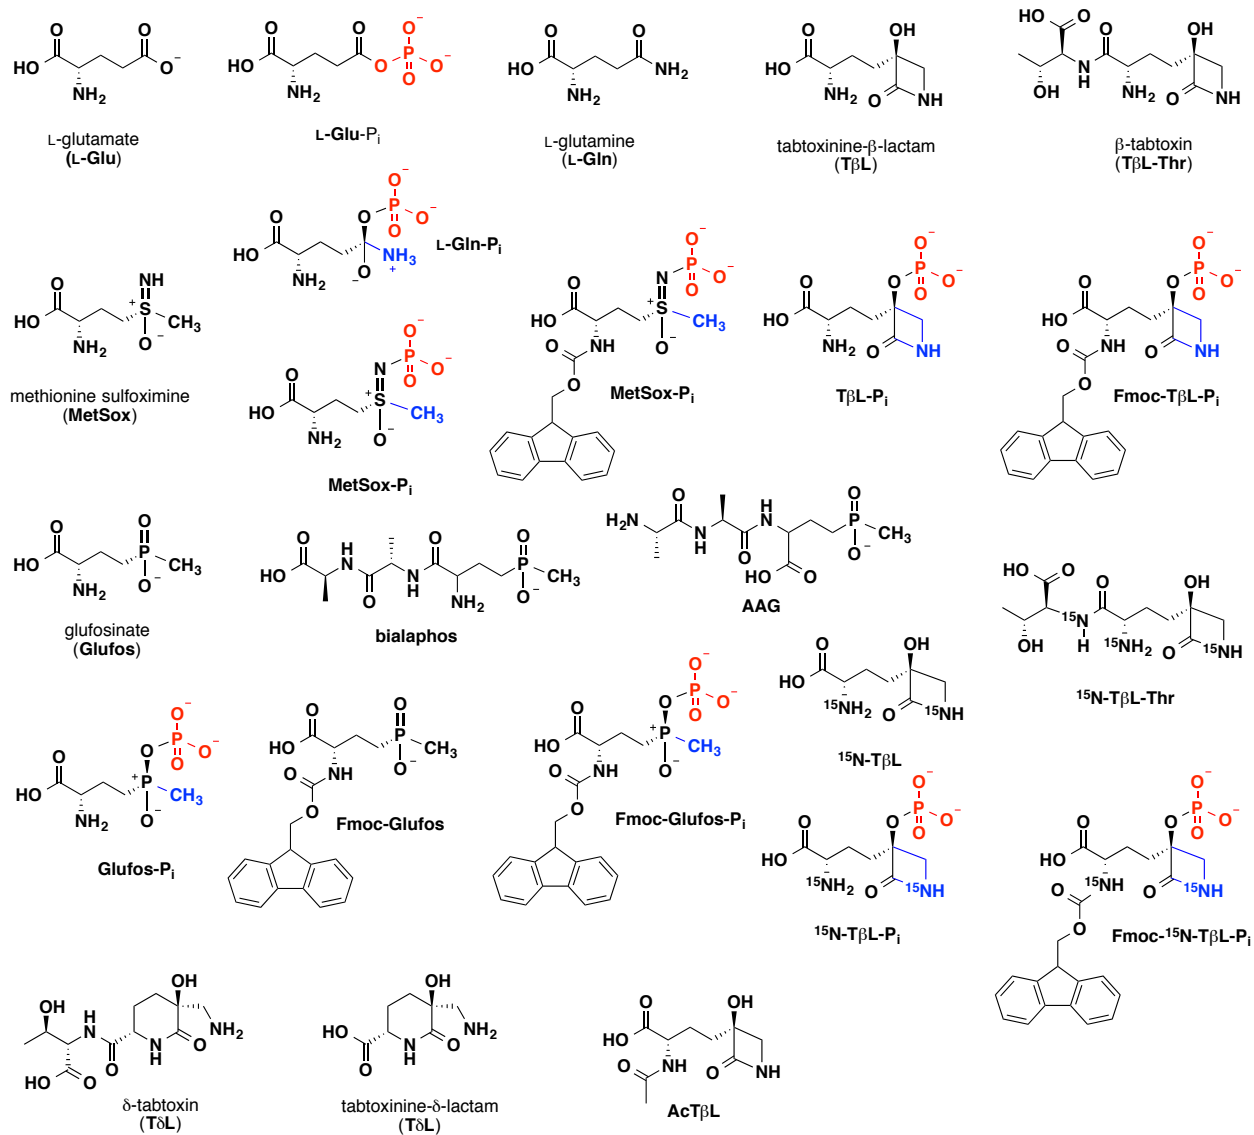

**Supplementary Figure 1.** Structures and abbreviations of compounds used in this work.

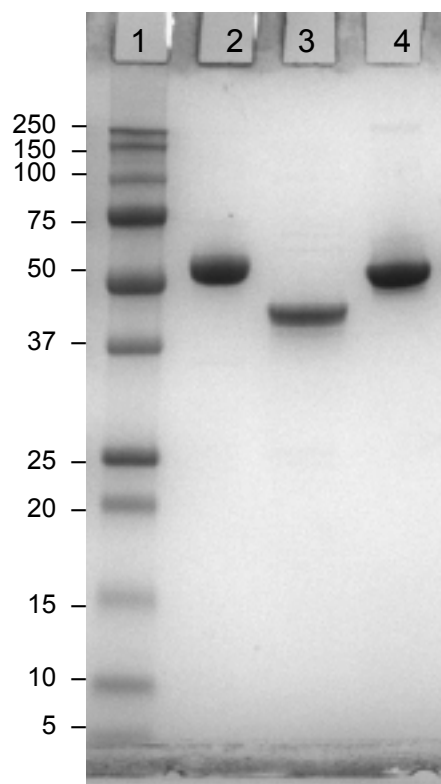

**Supplementary Figure 2.** SDS-PAGE analysis of purified *N*-His<sub>6</sub>-GS homologs used in this work. SDS-PAGE gels (Any *kD*, Bio-Rad) were loaded with protein ladder (Precision Plus Protein Dual Xtra Prestained Protein Standards, Bio-Rad) in lane 1 and Ni-NTA elutions for recombinant *N*-His<sub>6</sub>-GS from *E. coli* (54.1 kD), *H. sapiens* (44.2 kD), and *S. aureus* (53.0 kD) in lanes 2,3, and 4, respectively. Gel was stained with Coomassie blue.

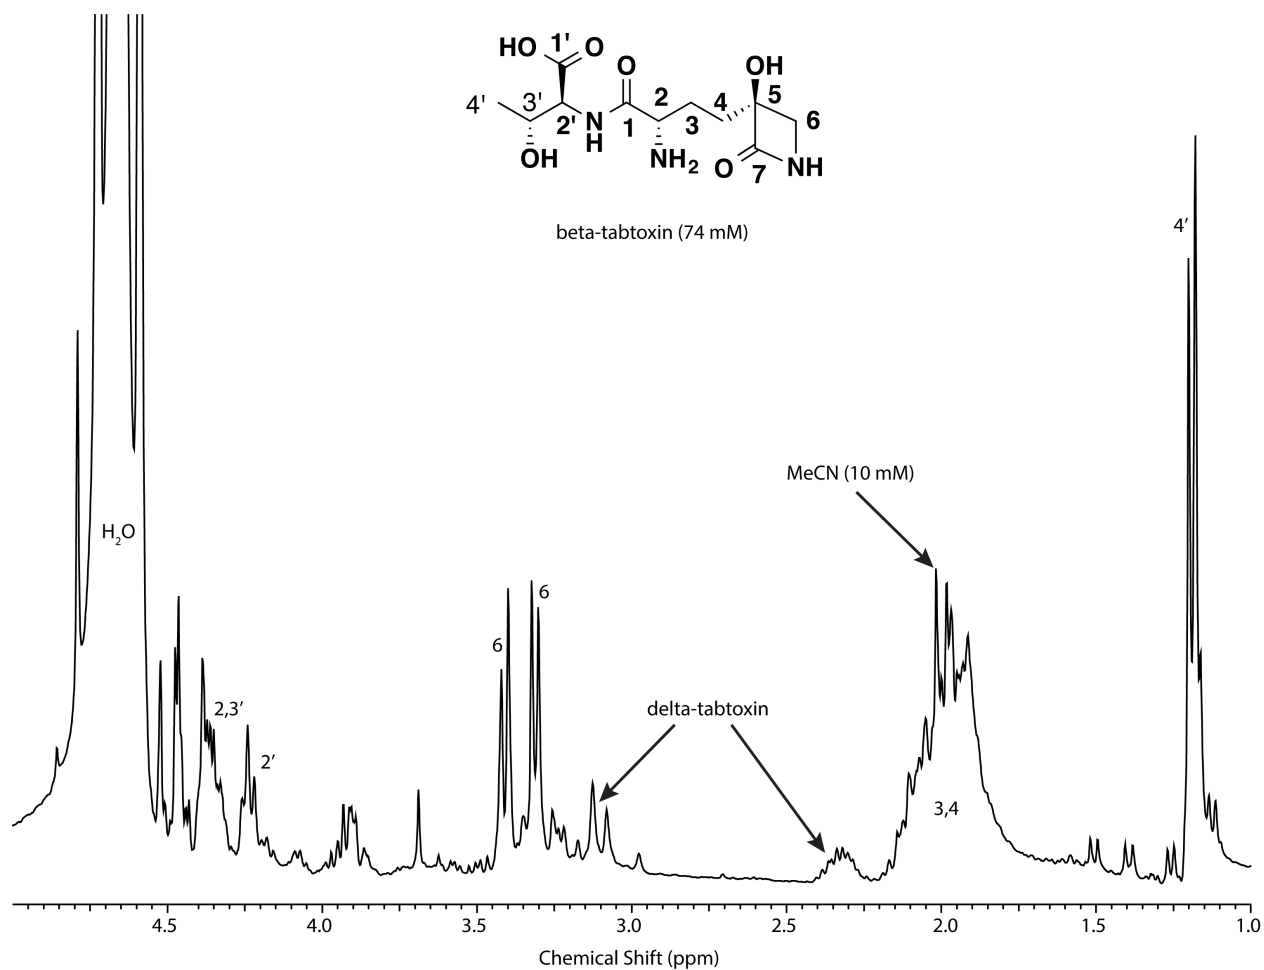

**Supplementary Figure 3.** Representative <sup>1</sup>H-NMR (300 MHz) of quantified tabtoxin (74 mM) after HILIC chromatography taken in D<sub>2</sub>O with an acetonitrile (10 mM) internal standard. For full purification and characterization of tabtoxin see our previous publication<sup>1</sup>.

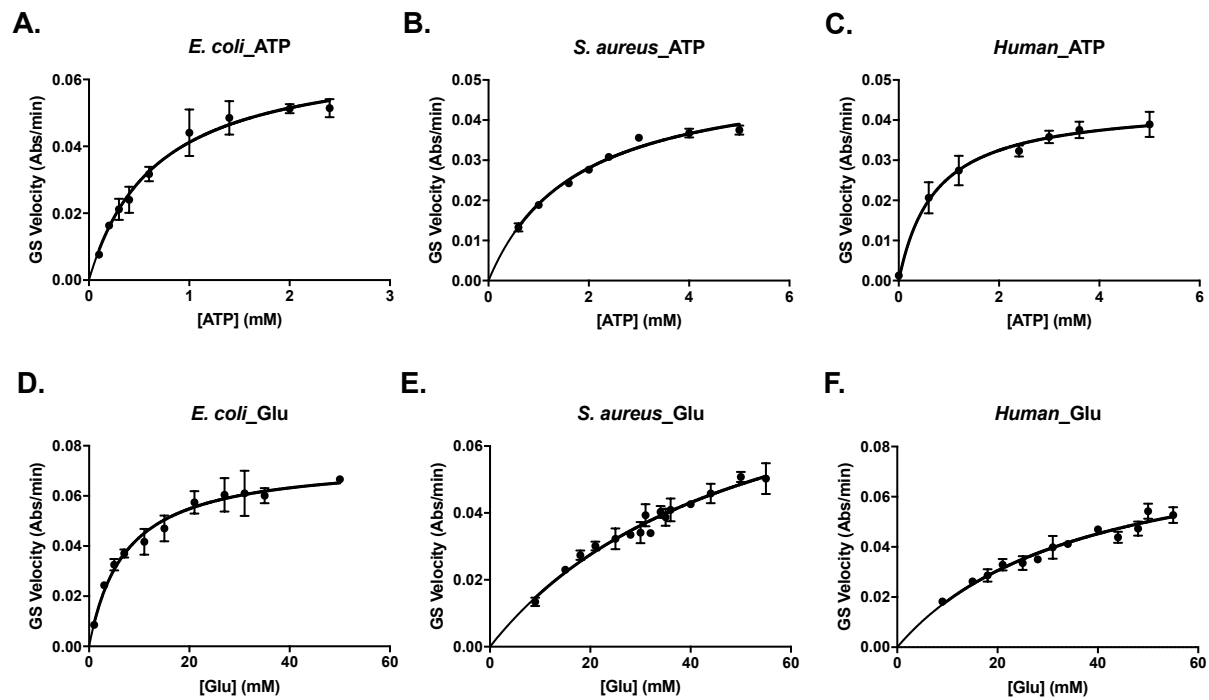

**Supplementary Figure 4.** Michaelis-Menten plots for GS homologs.



20160523\_Garret\_C8\_HCOOH\_TBLP #1227-1264 RT: 6.1-6.3 AV: 6 NL: 1.92E6  
T: FTMS + p ESI Full lock ms [200.00-500.00]

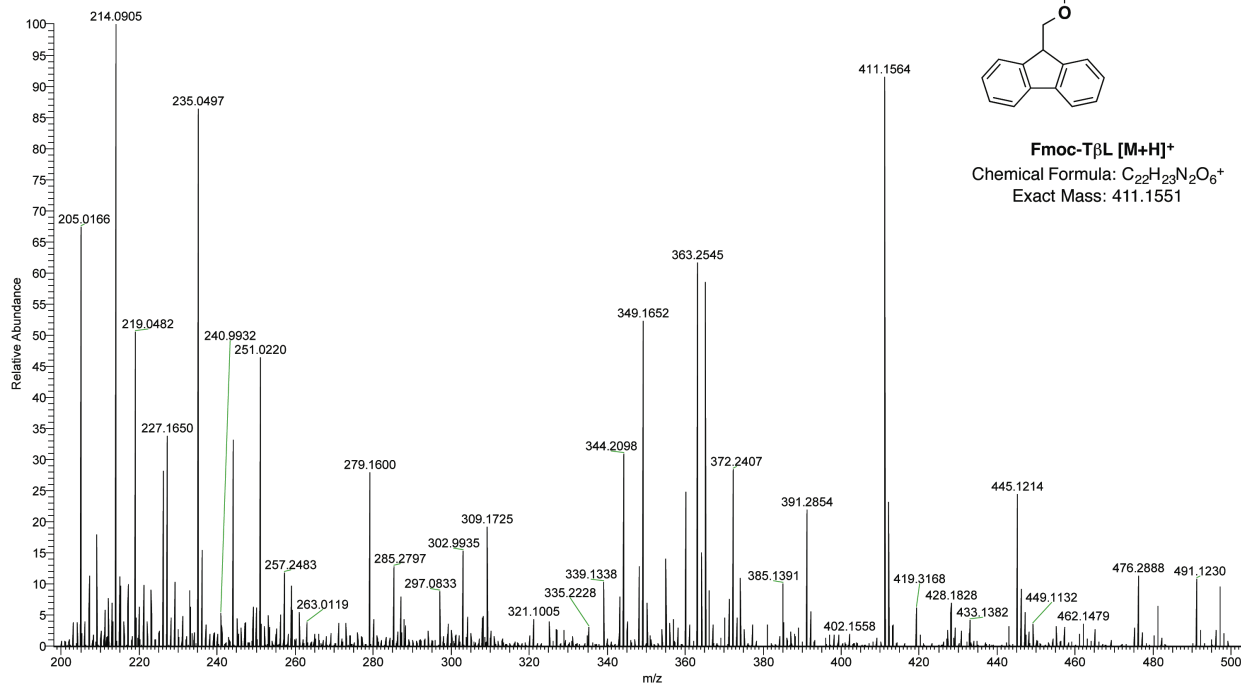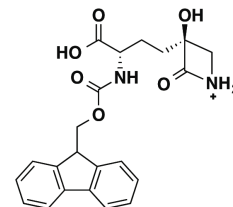

20160523\_Garret\_C8\_HCOOH\_TBLP #1232-1260 RT: 6.1-6.2 AV: 5 NL: 7.24E5  
F: FTMS + p ESI Full ms 2 411.16@hcd25.00 [50.00-440.00]

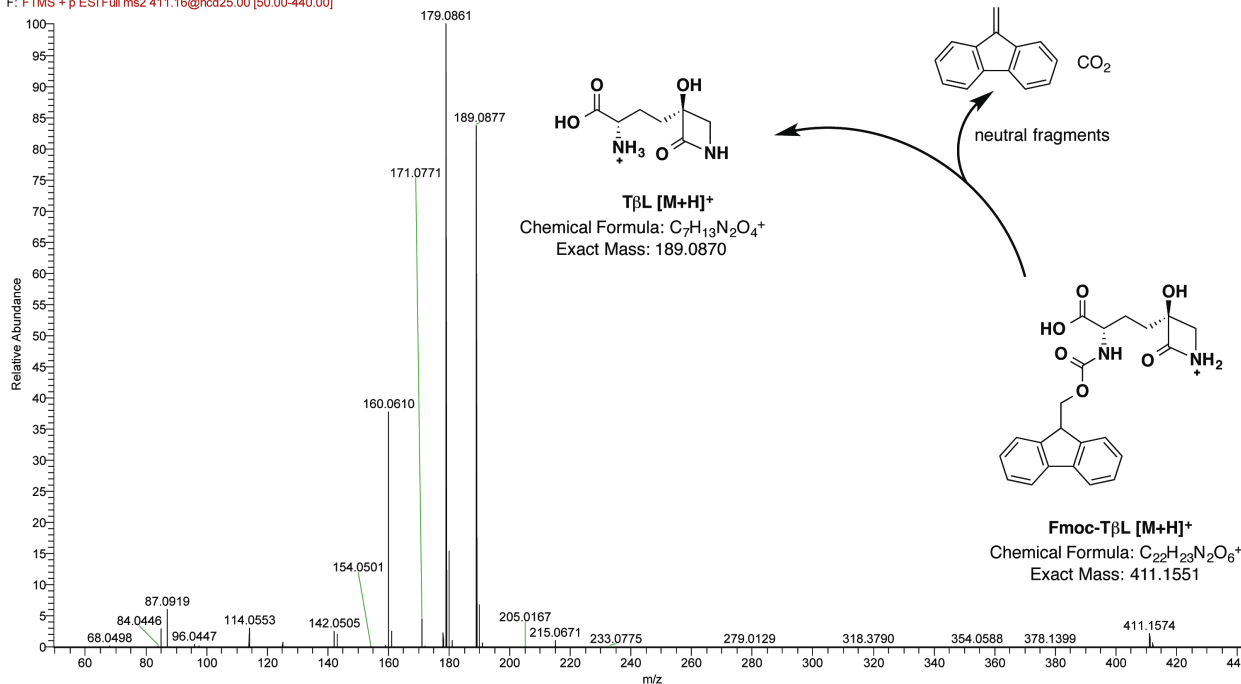

20160523\_Garret\_C8\_HCOOH\_TBLP #1149-1471 RT: 5.7-7.3 AV: 54 NL: 3.27E5  
T: FTMS - p ESI Full lock ms [200.00-500.00]

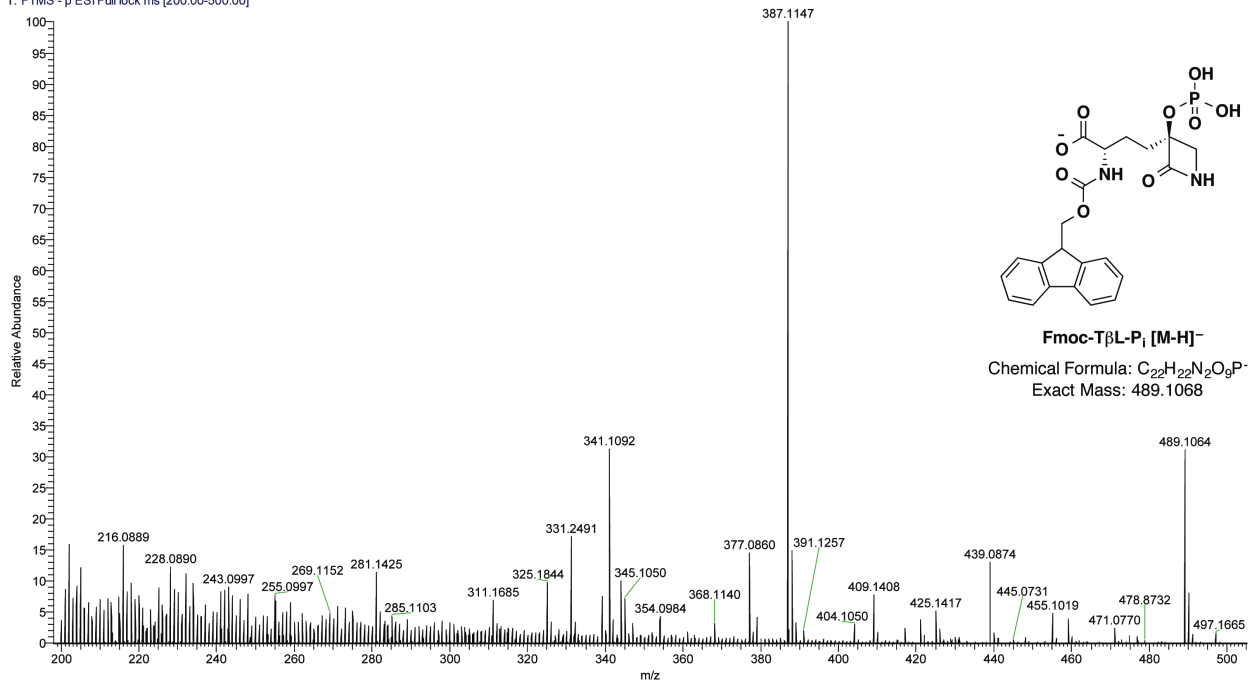

20160523\_Garret\_C8\_HCOOH\_TBLP #1172-1388 RT: 5.8-6.9 AV: 36 NL: 1.01E5  
F: FTMS - p ESI Full ms 2 489.11@hcd25.00 [50.00-520.00]

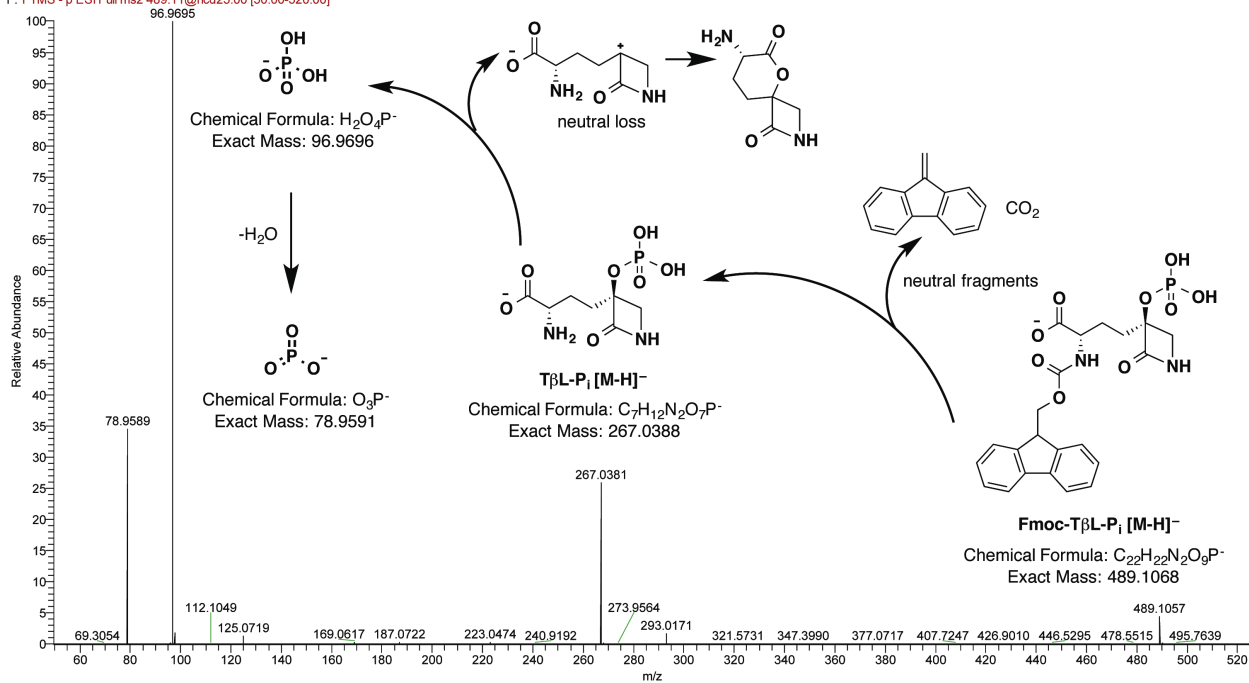

Supplementary Figure 5. High-resolution MS and MS/MS of Fmoc-TβL and FmocTβL-P<sub>i</sub>.

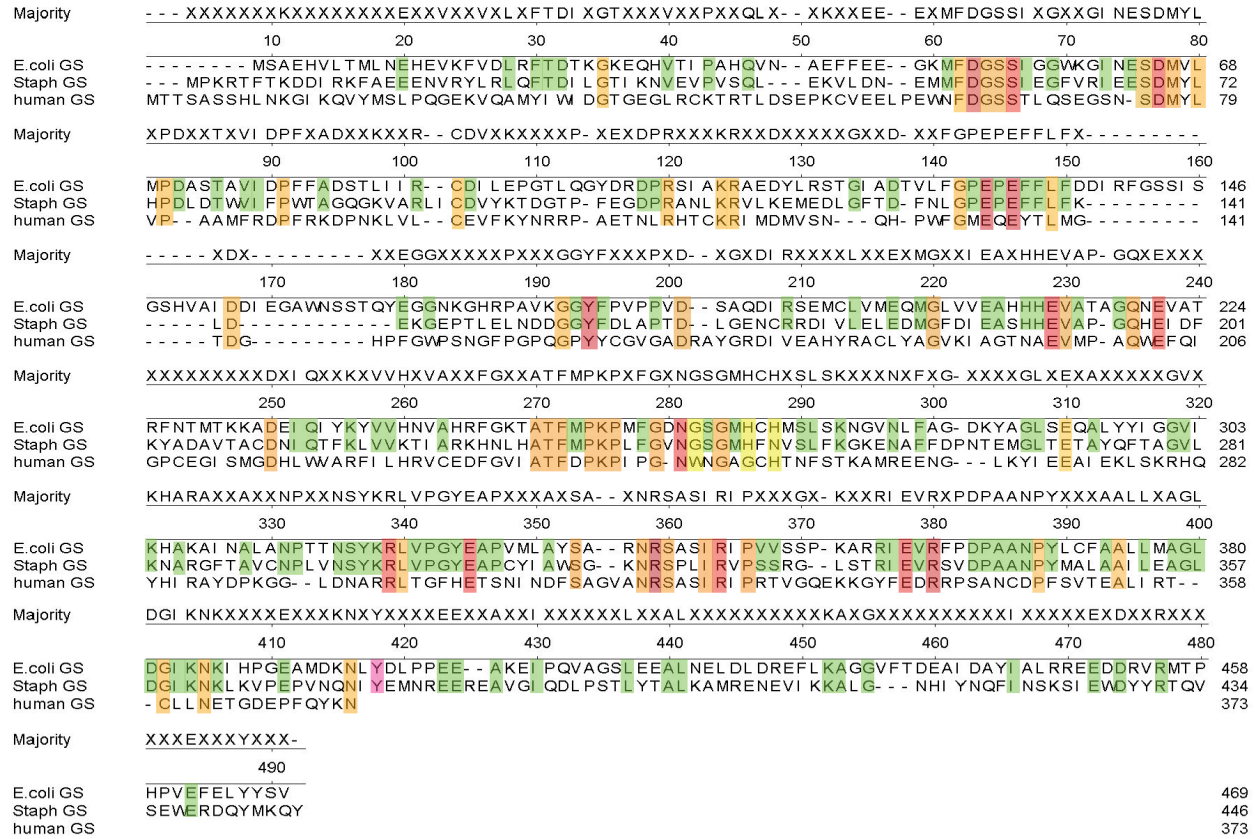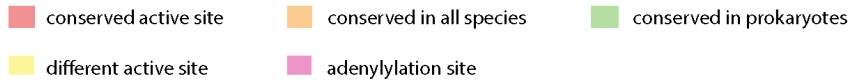

**Supplementary Figure 6.** Primary sequence alignments of *E. coli*, *S. aureus*, and Human GS performed using Clustal W.

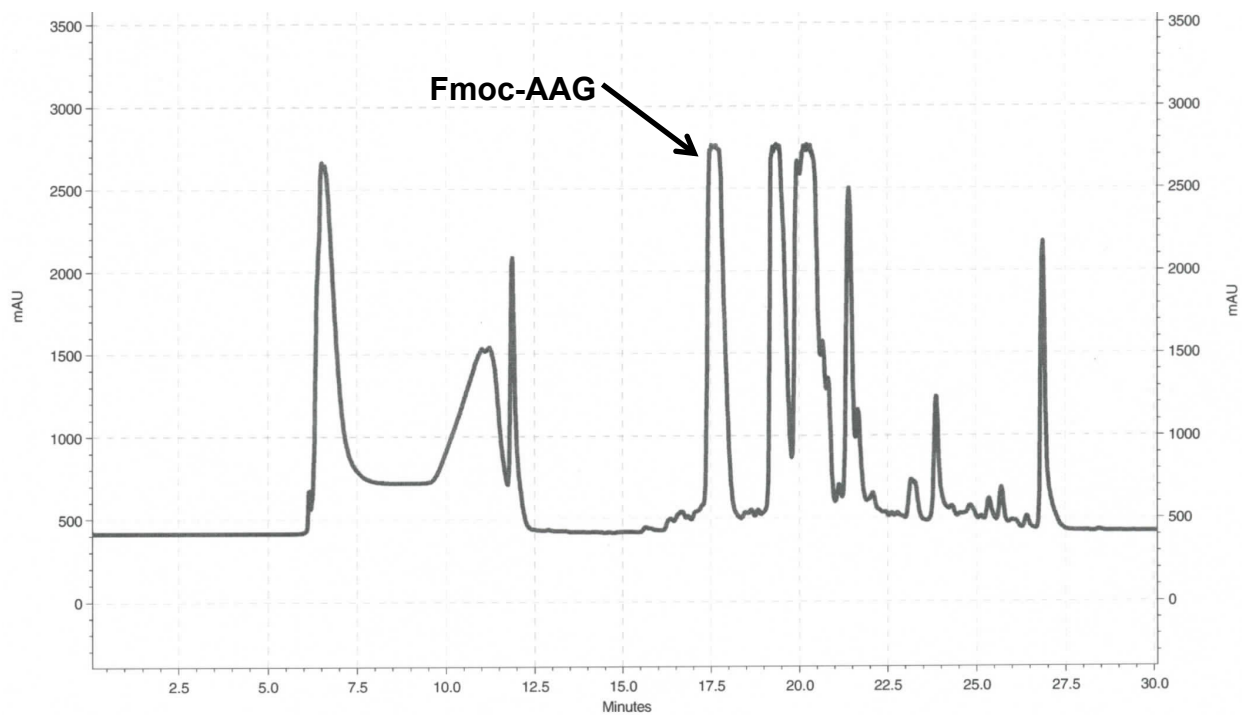

**Supplementary Figure 7.** Prep-HPLC chromatogram for purification of **Fmoc-AAG**. x-Axis represents retention time (min). y-Axis represents absorbance at 254 nm.

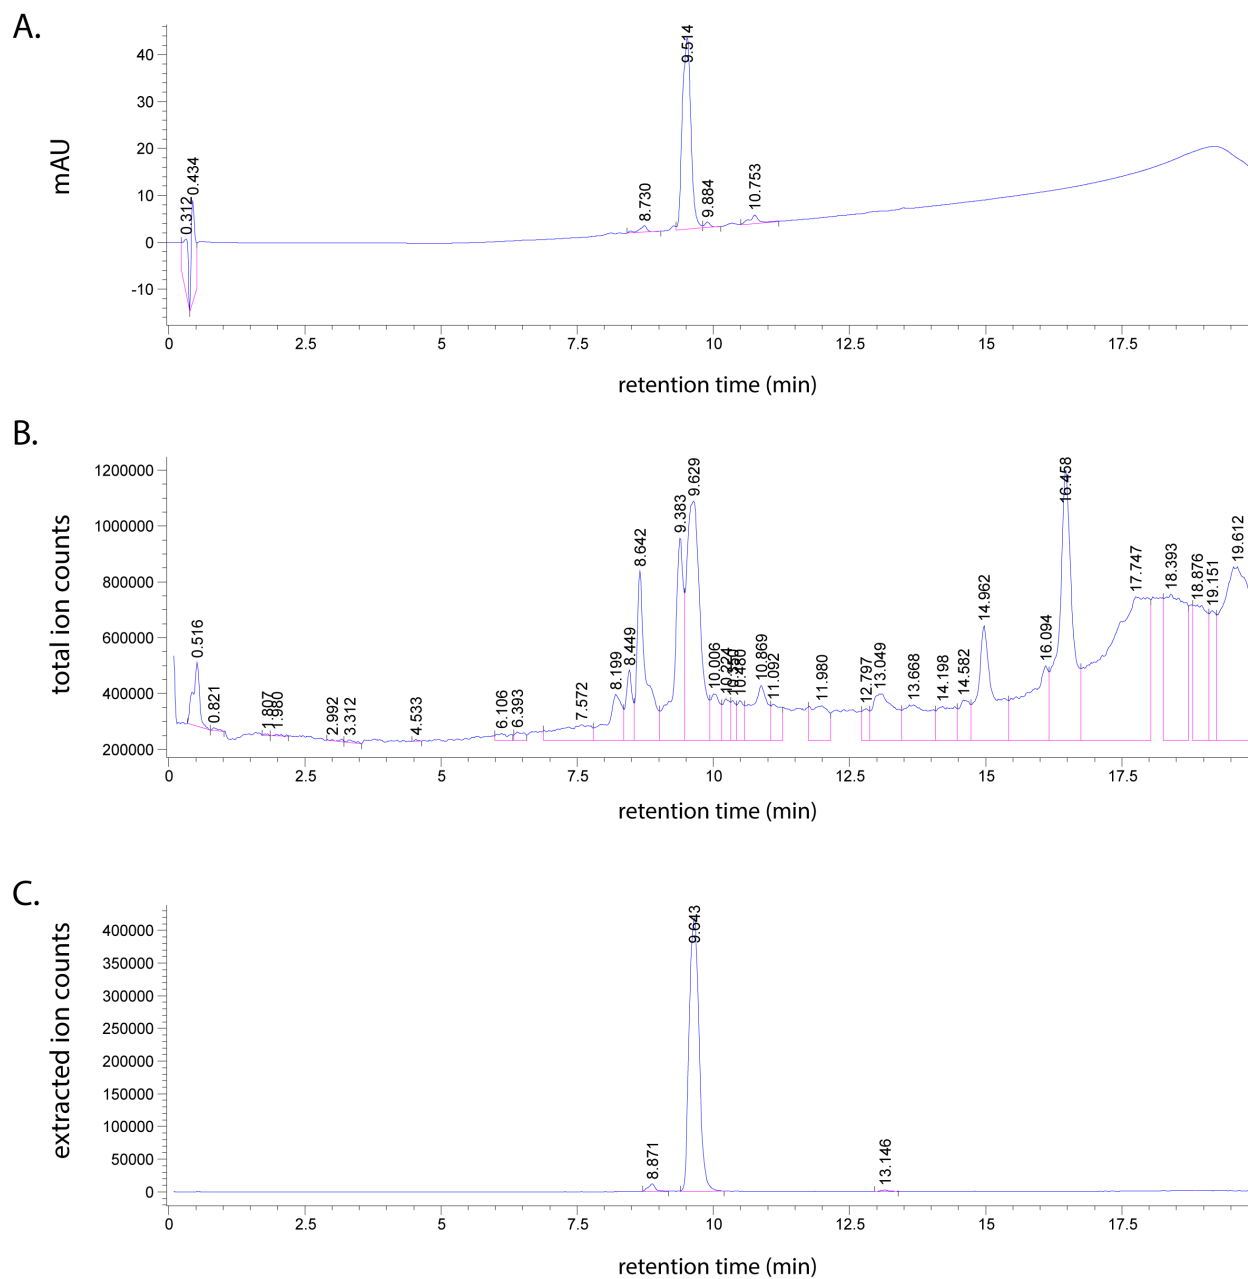

**Supplementary Figure 8.** LC-MS chromatograms of synthetic **Fmoc-AAG**. **(A)** Chromatogram of optical absorbance at 254 nm. **(B)** Total ion chromatogram (TIC). **(C)** Extracted ion chromatogram (EIC) for  $m/z = 546.2$  corresponding to the  $[M+H]^+$  ion of **Fmoc-AAG**.

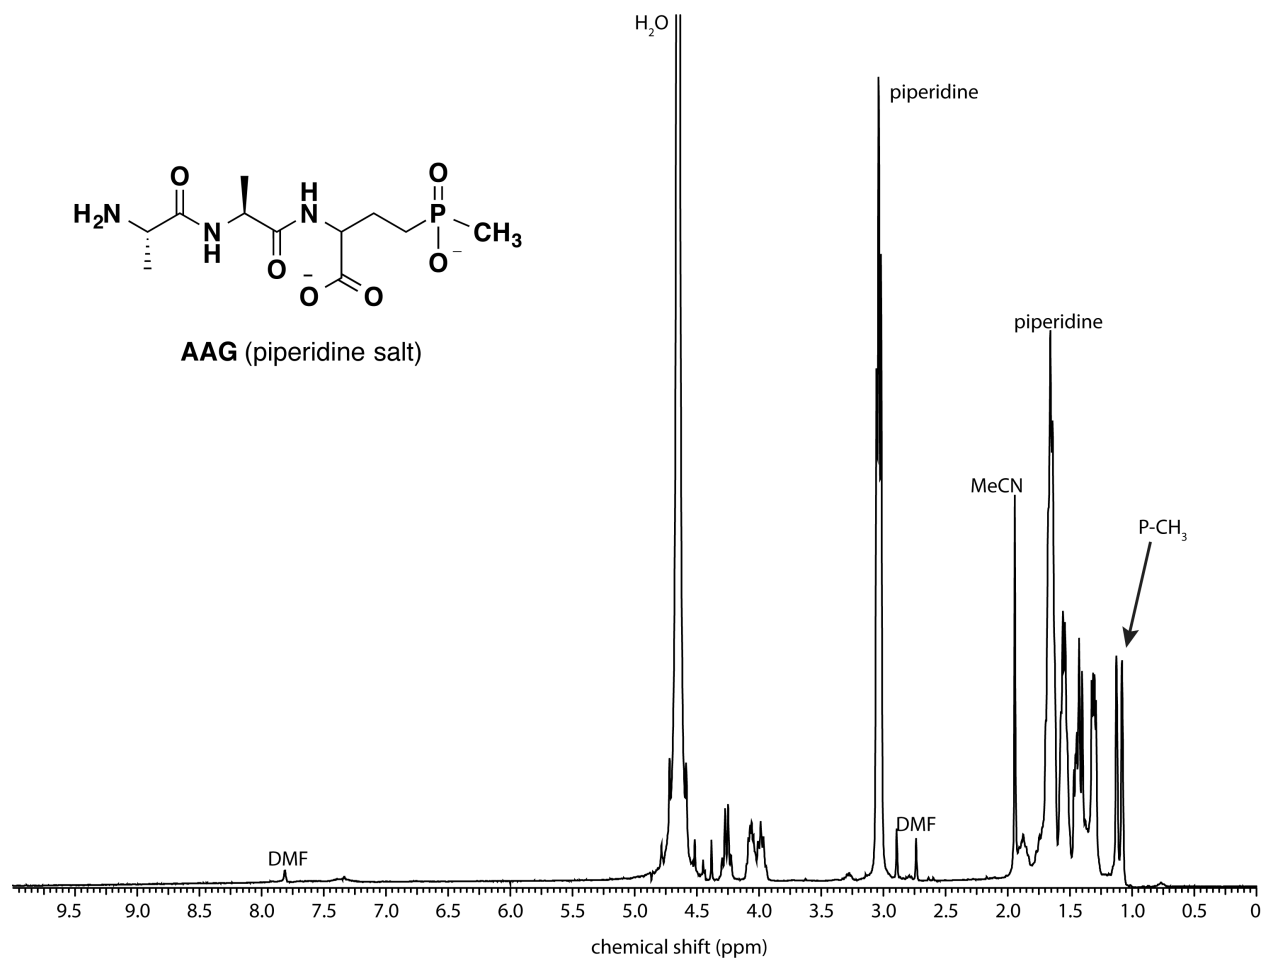

**Supplementary Figure 9.** <sup>1</sup>H-NMR (300 MHz) of AAG (piperidine salt) after Fmoc-deprotection in DMF. Spectrum was obtained in D<sub>2</sub>O with an acetonitrile internal standard.

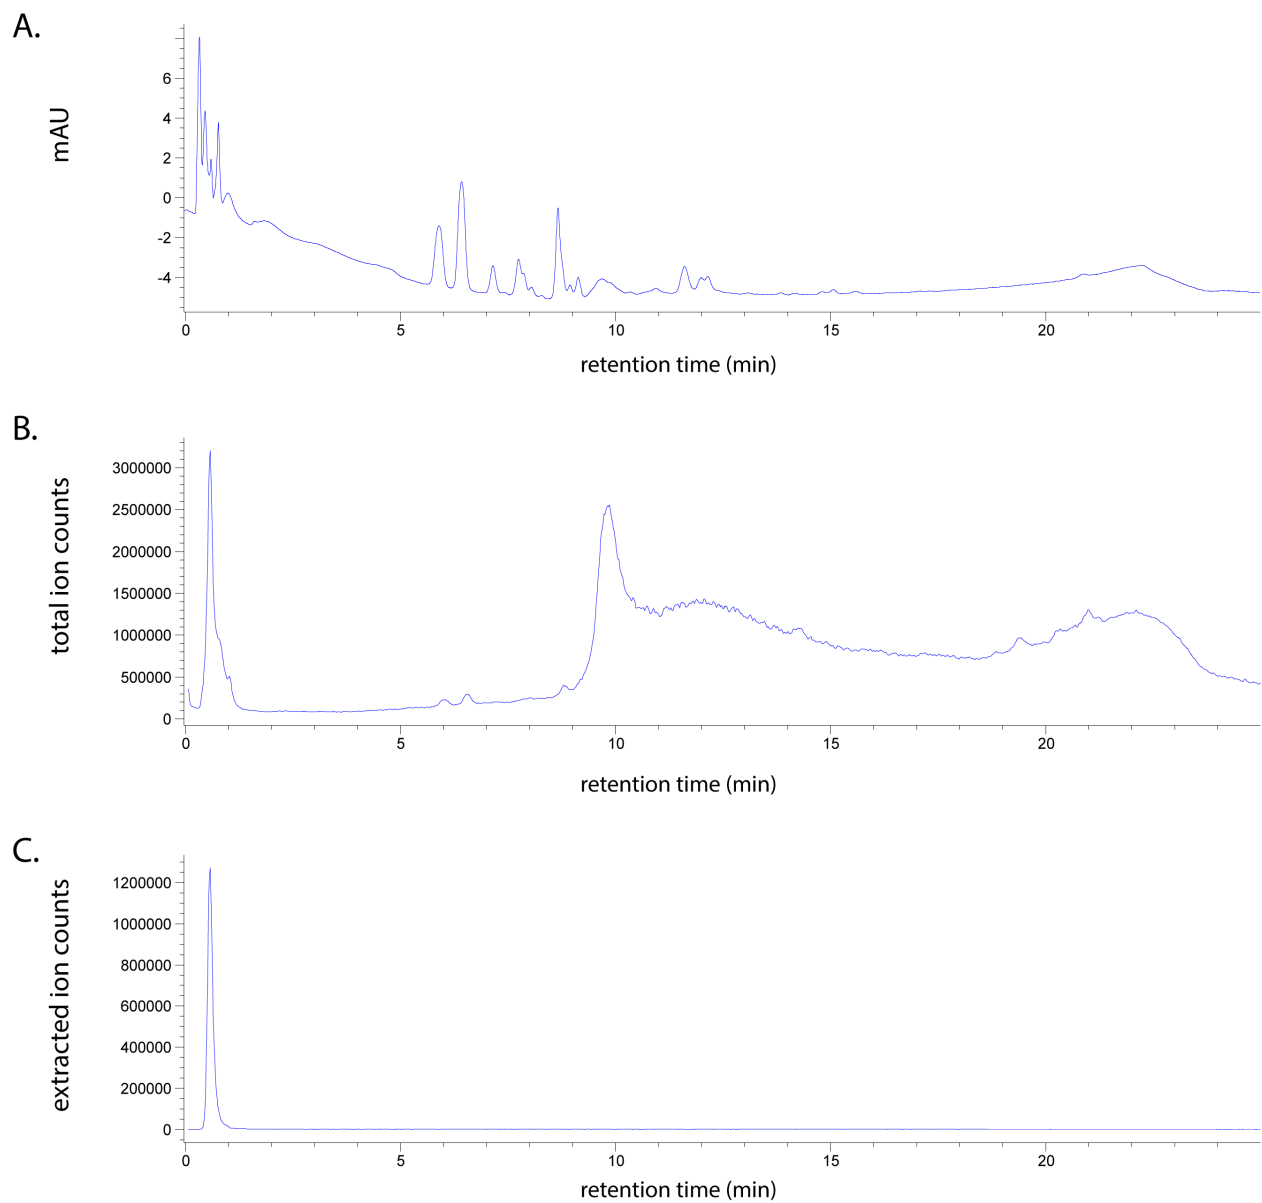

**Supplementary Figure 10.** LC-MS chromatograms of synthetic **AAG**. **(A)** Chromatogram of optical absorbance at 254 nm. **(B)** Total ion chromatogram (TIC). **(C)** Extracted ion chromatogram (EIC) for  $m/z = 324.1$  corresponding to the  $[M+H]^+$  ion of **AAG**.

### III. Supplementary Schemes

**AAG** was synthesized in two steps from Fmoc-L-Ala-L-Ala and ( $\pm$ ) **Glufos**. Fmoc-L-Ala-L-Ala (177 mg, 0.46 mmol) and *i*Pr<sub>2</sub>EtN (0.45 mL) were dissolved in CH<sub>3</sub>CN (20 mL) and H<sub>2</sub>O (5 mL). The clear, yellow solution was stirred at rt for 20 min before addition of ( $\pm$ ) **Glufos** (30 mg, 0.15 mmol). After 27 hrs, the reaction mixture was concentrated under reduced pressure. The crude material was dissolved in 40 mL of 50:50 CH<sub>3</sub>CN:H<sub>2</sub>O and purified by RP-C18 prep-HPLC using a linear gradient of 5% (B) to 95% (B) over 20 min. **Fmoc-AAG** eluted at ~17 min and the identity was confirmed by LC-MS (retention time = 9.7 min, MS (ESI) calculated for C<sub>26</sub>H<sub>33</sub>N<sub>3</sub>O<sub>8</sub>P: 546.2 [M+H]<sup>+</sup>, found 546.2). Fractions containing pure **Fmoc-AAG** were combined and concentrated under reduced pressure before treatment with 20 mL of 20% piperidine in DMF (formation of white vapor was observed). After 3 hrs at rt, the DMF/piperidine were removed via rotary evaporation to give the **AAG** piperidine salt (14.3 mg, 0.37 mmol) in 29% overall yield. **AAG** purity was analyzed by LC-MS (retention time = 0.7 min, MS (ESI) calculated for C<sub>11</sub>H<sub>23</sub>N<sub>3</sub>O<sub>6</sub>P: 324.1 [M+H]<sup>+</sup>, found 324.1) and <sup>1</sup>H-NMR (P-Me, 1.10 ppm, d, *J* = 13.4 Hz)<sup>2,3</sup>.

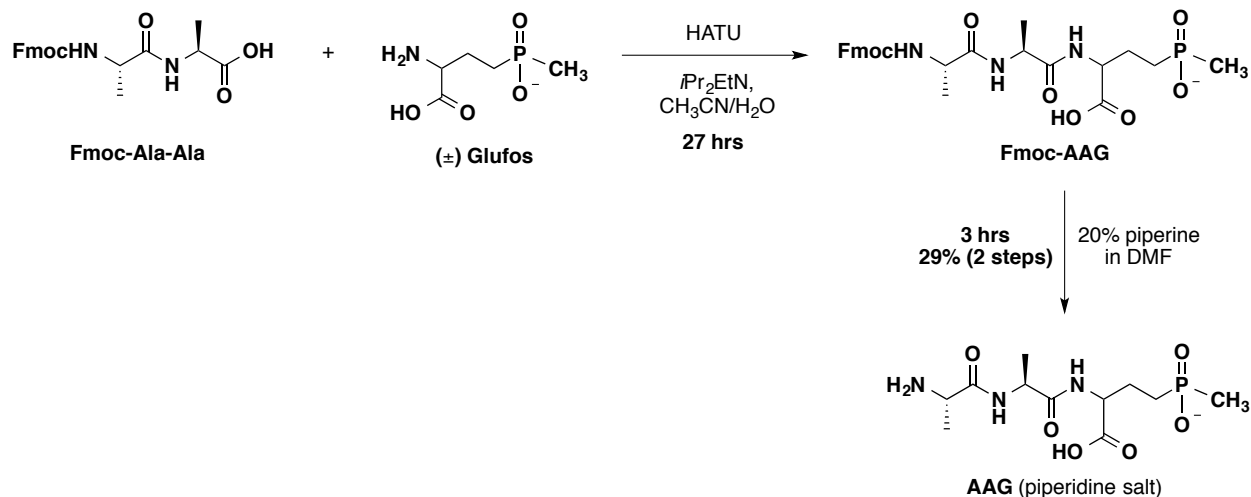

**Supplementary Scheme 1.** Synthesis of L-Ala-L-Ala-Glufos (**AAG**).



#### IV. Acknowledgements

We thank A. D'Avignon (formerly WUSTL, Dept. of Chemistry; currently Sanford Burnham Medical Research Institute, Orlando, FL), J. Kao (WUSTL, Dept. of Chemistry), and B. Marsden (WUSTL, Dept. of Chemistry) for assistance in the acquisition of solution NMR spectra. We thank Dr. Brad Evans at the Proteomics & Mass Spectrometry Facility at the Donald Danforth Plant Science Center, St. Louis, MO for assistance with the acquisition of the QTRAP LC-MS/MS spectra (supported by the National Science Foundation under Grant No. DBI-0521250). We thank Margaret Reck (WUSTL, Dept. of Chemistry) for assistance purifying tabtoxin from *P. syringae* cultures. We thank Dr. Joe Jez and Cynthia Holland (WUSTL, Dept. of Biology) for diligent efforts crystallizing GS and analyzing diffraction patterns at the advanced photon source at Argonne National Laboratory.

#### V. References

1. Wencewicz, T. A.; Walsh, C. T. "Pseudomonas syringae self-protection from tabtoxinine- $\beta$ -lactam by ligase TblF and acetylase Ttr." *Biochemistry* **2012**, *51*, 7712-7725.
2. Bayer, E.; Gugel, K. H.; Hagele, K.; Hagenmaier, H.; Jessipow, S.; Konig, W. A.; Zahner, H. "25. Stoffwechselprodukte von microorganismen. Phosphinothricin und phosphinothricyl-alanyl-alanyl." *Helv. Chim. Acta* **1972**, *55*, 224- 239.
3. Omura, S.; Hinotozawa, K.; Imamura, N.; Murata, M. "The structure of phsalacine, a new herbicidal antibiotic containing phosphinothricin." *J. Antibiotics* **1984**, *37*, 939-940.
